# Supplementary material for: The water-insoluble organic carbon in PM 2.5 of typical Chinese urban areas: light-absorbing properties, potential sources, radiative forcing effects, and a possible light-absorbing continuum
Source: Copernicus journal article supplement (doi:10.5194/acp-24-7755-2024), 2024-07-09
Supplement: Supplementary file 1 [file acp-24-7755-2024-supplement.pdf]

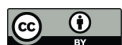

*Supplement of*

**The water-insoluble organic carbon in PM<sub>2.5</sub> of typical Chinese urban areas: light-absorbing properties, potential sources, radiative forcing effects, and a possible light-absorbing continuum**

**Yangzhi Mo et al.**

*Correspondence to:* Gan Zhang (zhanggan@gig.ac.cn)

The copyright of individual parts of the supplement might differ from the article licence.

1 **Text S1. Water soluble inorganic ions measurements**

2 3 anions (Cl<sup>-</sup>, NO<sub>3</sub><sup>-</sup> and SO<sub>4</sub><sup>2-</sup>) and 4 cations (Na<sup>+</sup>, K<sup>+</sup>, Ca<sup>2+</sup> and NH<sub>4</sub><sup>+</sup>) were analyzed with ion-  
3 chromatography (761 Compact IC, Metrohm, Switzerland). Anions were separated on a Metrohm Metrosep  
4 A sup5-250 column with 3.2 mM Na<sub>2</sub>CO<sub>3</sub> and 1.0 mM NaHCO<sub>3</sub> as the eluent and 35 mM H<sub>2</sub>SO<sub>4</sub> for a  
5 suppressor. Cations were measured using a Metrohm Metrosep C4-150 column with 2 mM sulfuric acid as  
6 the eluent. The injection loop volume for anion and cation was 100 μL. The water-soluble ions analyses  
7 were duplicated for several filter samples, and the overall relative standard deviations were generally less  
8 than 4%.

9  
10 **Text S2. Calculation of MAC for particulate light-absorbing OC**

11  
12 MAC can be compared with MAE only after considering the particulate effect ( $\xi$ ) and in the small-particle  
13 limit (diameter  $\ll \lambda$ ) (Sun et al., 2007):

14  
15 
$$\text{MAC}(\lambda) = \text{MAE}(\lambda) \times \xi(\lambda) \quad (\text{S1})$$

16 
$$\xi(\lambda) = \frac{9n}{(n^2 - k(\lambda)^2 + 2) + 4n^2k(\lambda)^2} \quad (\text{S2})$$

17 where  $n$  and  $k$  represent the real and imaginary parts of the complex refractive index ( $m = n + ik$ ),  
18 respectively. In this study, we assume a constant  $n$  value of 1.55 (Lu et al., 2015), and the wavelength-  
19 dependent  $k$  is calculated as:

20 
$$k(\lambda) = \frac{\rho \times \lambda \times \text{MAE}(\lambda)}{4\pi \times \left(\frac{\text{OA}}{\text{OC}}\right)} \quad (\text{S3})$$

21 where  $\rho$  is the density of particle and was fixed to 1.2 g/cm<sup>3</sup>. The OA/OC ratios are 1.51, 1.91, 2.30 for  
22 WIOC, HULIS and non-HULIS, respectively (Kiss et al., 2002).

23  
24  
25

26  
27  
28  
29

**Table S1.** Summary of concentration and light absorption of extractible organic carbon components in PM<sub>2.5</sub> from ten Chinese cities

| Component                                                   | Unit               | Warm seasons<br>rang (avg <sup>a</sup> ± std <sup>b</sup> ) | Cold seasons<br>rang (avg ± std) | Annual<br>avg ± std |
|-------------------------------------------------------------|--------------------|-------------------------------------------------------------|----------------------------------|---------------------|
| WIOC                                                        |                    | 1.45–5.25 (2.29 ± 0.95)                                     | 1.93–12.9 (4.87 ± 2.89)          | 3.65 ± 2.53         |
| HULIS-C                                                     | μgC/m <sup>3</sup> | 1.37–4.31 (2.46 ± 0.77)                                     | 2.10–7.64 (4.63 ± 1.49)          | 3.60 ± 1.62         |
| Non-HULIS-C <sup>c</sup>                                    |                    | 1.28–5.61 (2.36 ± 1.16)                                     | 1.55–7.96 (4.09 ± 1.51)          | 3.27 ± 1.60         |
| EX-OC <sup>d</sup>                                          |                    | 4.19–12.8 (7.11 ± 2.38)                                     | 6.25–25.2 (13.6 ± 5.22)          | 10.5 ± 5.23         |
| Abs <sub>365, WIOC</sub>                                    | Mm <sup>-1</sup>   | 1.27–7.69 (2.76 ± 1.77)                                     | 2.78–38.5 (10.4 ± 8.69)          | 6.80 ± 7.44         |
| Abs <sub>365, HULIS</sub>                                   |                    | 1.04–6.05 (2.96 ± 1.4)                                      | 2.27–17.2 (8.72 ± 3.75)          | 5.99 ± 4.08         |
| Abs <sub>365, non-HULIS</sub>                               |                    | 0.53–2.72 (1.25 ± 0.68)                                     | 1.11–8.50 (3.76 ± 2.27)          | 2.57 ± 2.11         |
| Abs <sub>365, EX-OC</sub>                                   |                    | 3.24–16.1 (6.98 ± 3.54)                                     | 6.42–55.4 (22.9 ± 13.0)          | 15.4 ± 12.6         |
| WIOC/EX-OC                                                  |                    | 15.4–48.7 (32.5 ± 6.97)                                     | 19.8–57.5 (34.2 ± 8.12)          | 33.4 ± 7.55         |
| HULIS-C/EX-OC                                               |                    | 25.2–45.4 (35.1 ± 5.29)                                     | 19.2–47.6 (35.3 ± 6.32)          | 35.2 ± 5.77         |
| Non-HULIS-C/EX-OC                                           | %                  | 21.1–43.8 (32.4 ± 5.92)                                     | 23.4–36.6 (30.5 ± 4.34)          | 31.4 ± 5.17         |
| Abs <sub>365, WIOC</sub> /Abs <sub>365, EX-OC</sub>         |                    | 20.3–50.6 (38.4 ± 9.06)                                     | 29.4–69.6 (42.5 ± 10.1)          | 40.5 ± 9.73         |
| Abs <sub>365, HULIS-C</sub> /Abs <sub>365, EX-OC</sub>      |                    | 32.2–55.1 (42.8 ± 6.54)                                     | 22.5–57.9 (40.5 ± 7.90)          | 41.6 ± 7.28         |
| Abs <sub>365, non-HULIS-C</sub> / Abs <sub>365, EX-OC</sub> |                    | 9.51–26.8 (18 ± 4.43)                                       | 6.80–30.4 (17.0 ± 5.58)          | 17.5 ± 5.02         |

30  
31  
32  
33  
34  
35  
36  
37

<sup>a</sup> avg: average

<sup>b</sup> std: standard deviation

<sup>c</sup> The concentration of non-HULIS-C is calculated by the difference between WSOC and HULIS-C

<sup>d</sup> The concentration of extractible organic carbon (EX-OC) is the sum of WSOC and WIOC.

38  
39  
40  
41  
42  
43  
44  
45  
46  
47  
48  
49  
50  
51  
52  
53  
54  
55  
56  
57  
58

**Table S2.** The person correlation coefficients ( $r$ ) of concentrations and Abs<sub>365</sub> of WIOC with water soluble ions in cold and warm seasons.

|                               | Concentrations of WIOC |              | Abs <sub>365</sub> of WIOC |              |
|-------------------------------|------------------------|--------------|----------------------------|--------------|
|                               | Warm seasons           | Cold seasons | Warm seasons               | Cold seasons |
| K <sup>+</sup>                | 0.04                   | 0.61**       | 0.25                       | 0.48*        |
| Cl <sup>-</sup>               | 0.46                   | 0.92**       | 0.63**                     | 0.90**       |
| NO <sub>3</sub> <sup>-</sup>  | 0.38                   | 0.29         | 0.53*                      | 0.18         |
| SO <sub>4</sub> <sup>2-</sup> | 0.44                   | 0.69**       | 0.51*                      | 0.63**       |
| NH <sub>4</sub> <sup>+</sup>  | 0.51*                  | 0.51*        | 0.59*                      | 0.49*        |

\* Significance at  $p < 0.05$  level

\*\* Significance at  $p < 0.01$  level

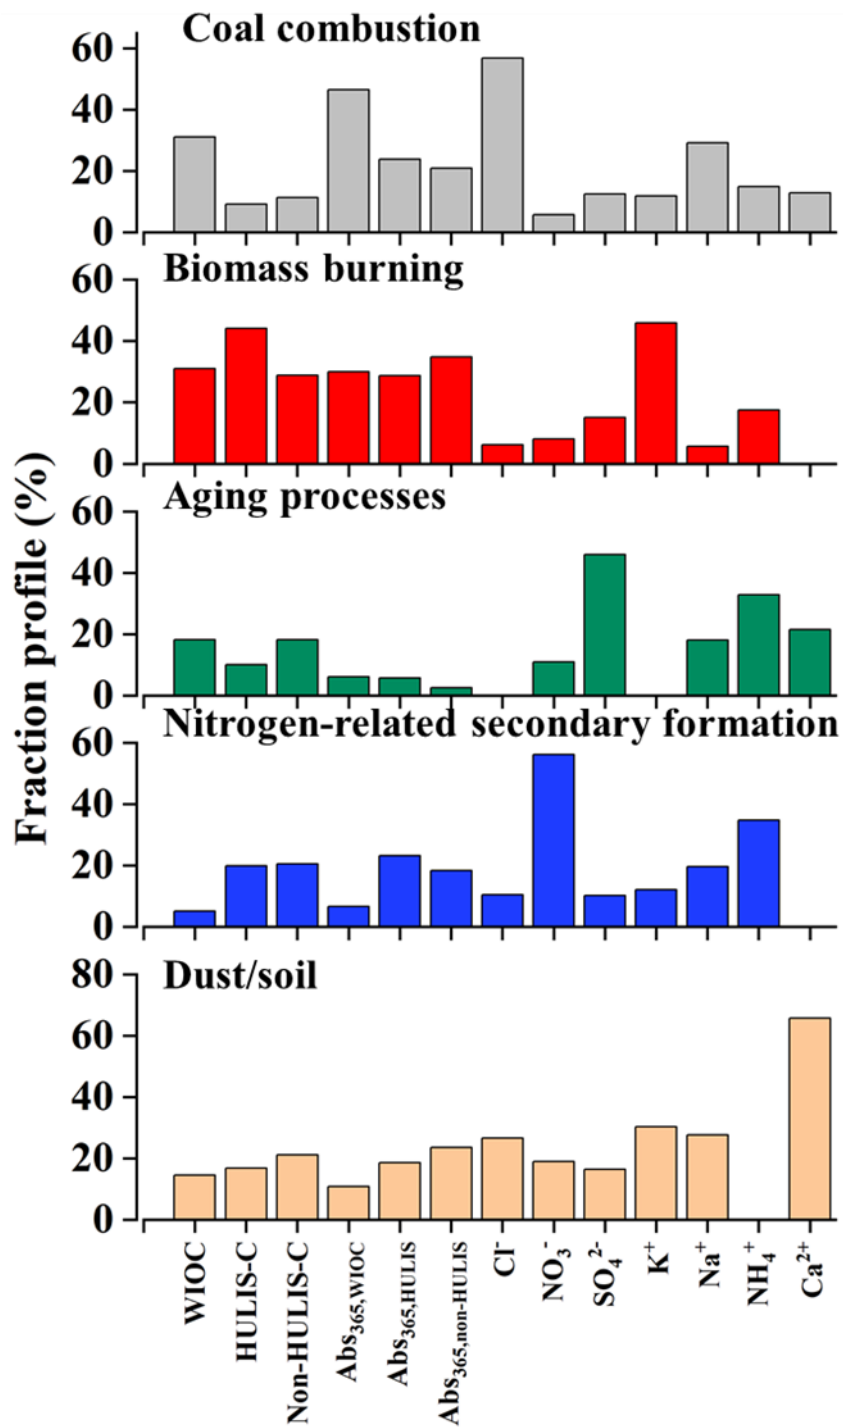

Figure S1. Source profiles for five sources resolved by the positive matrix factorization (PMF) model.

59  
60  
61  
62

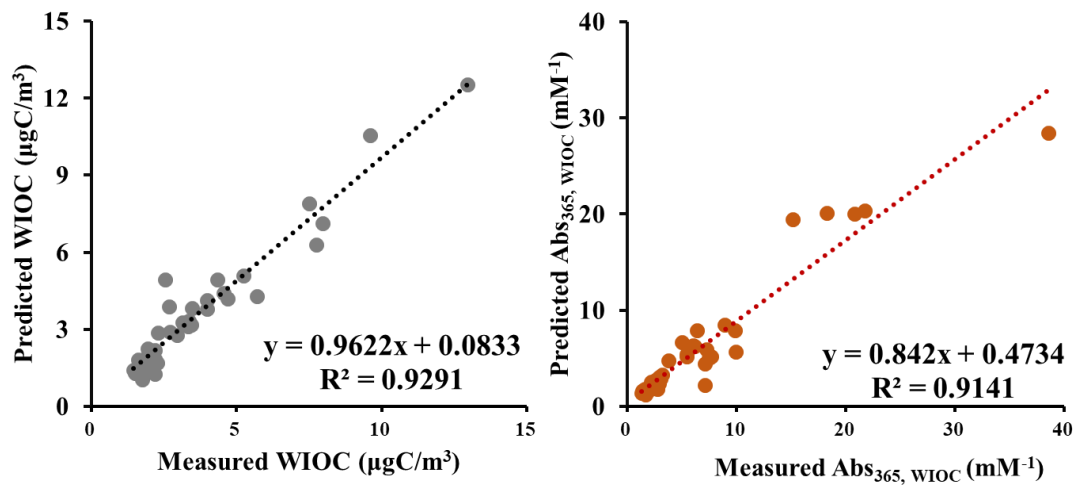

**Figure S2.** PMF-predicted versus measured values of (a) concentrations and (b) Abs<sub>365</sub> of WIOC.

63  
64  
65  
66  
67  
68  
69  
70  
71  
72  
73  
74  
75  
76  
77  
78  
79  
80  
81  
82  
83  
84  
85  
86  
87  
88  
89  
90  
91  
92  
93  
94  
95  
96  
97

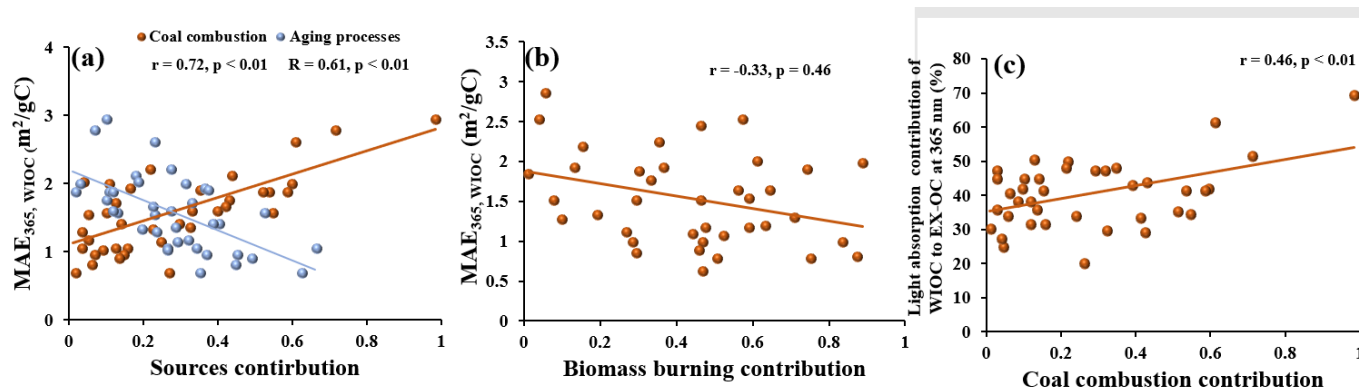

99

**Figure S3.** (a) The correlation of mass absorption efficient (MAE<sub>365</sub>) of WIOC to relative contribution of coal combustion (brown dots) and aging processes (blue dots). (b) The relationship between the MAE<sub>365</sub> of WIOC and relative contribution of biomass burning. (c) The relationship between relative contribution of coal combustion and light absorption contribution of WIOC to EX-OC at 365 nm.

100

101

102

103

104

105

106

107

108

## References:

109

Kiss, G., Varga, B., Galambos, I., Ganszky, I. (2002), Characterization of water-soluble organic matter isolated from atmospheric fine aerosol, *Journal of Geophysical Research-Atmospheres*, 107(D21).<https://doi.org/10.1029/2001jd000603>

110

111

112

Lu, Z.F., Streets, D.G., Winijkul, E., Yan, F., Chen, Y.J., Bond, T.C., Feng, Y., Dubey, M.K., Liu, S., Pinto, J.P., Carmichael, G.R. (2015), Light Absorption Properties and Radiative Effects of Primary Organic Aerosol Emissions, *Environmental Science & Technology*, 49(8), 4868-4877.<https://doi.org/10.1021/acs.est.5b00211>

113

114

115

116

Sun, H.L., Biedermann, L., Bond, T.C. (2007), Color of brown carbon: A model for ultraviolet and visible light absorption by organic carbon aerosol, *Geophysical Research Letters*, 34(17).<https://doi.org/10.1029/2007gl029797>

117

118

119

120

121
